# Supplementary material
Source: PubMed Central journal article supplement (PMC3064473)
Supplement: NIHMS253784-supplement-SI_part_B.pdf [file NIHMS253784-supplement-SI_part_B.pdf]

# Catalytic Asymmetric Synthesis of Allylic Thiol Derivatives

Larry E. Overman,\* Scott W. Roberts, and Helen F. Sneddon

*Department of Chemistry, 1102 Natural Sciences II, University of California,  
Irvine, California 92697-2025, USA*

## Supporting Information – Table of Contents

|                                                                      |            |
|----------------------------------------------------------------------|------------|
| <b>Materials and Methods</b> .....                                   | <b>S1</b>  |
| <b>Experimental Procedures</b> .....                                 | <b>S2</b>  |
| <b>NMR Spectra</b> .....                                             | <b>S16</b> |
| <b>SFC and GC Traces used to Determine Enantiomeric Purity</b> ..... | <b>S48</b> |





HFS-III-80-1  
10/02/07  
1H spectrum

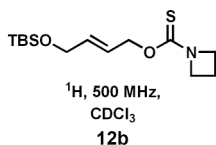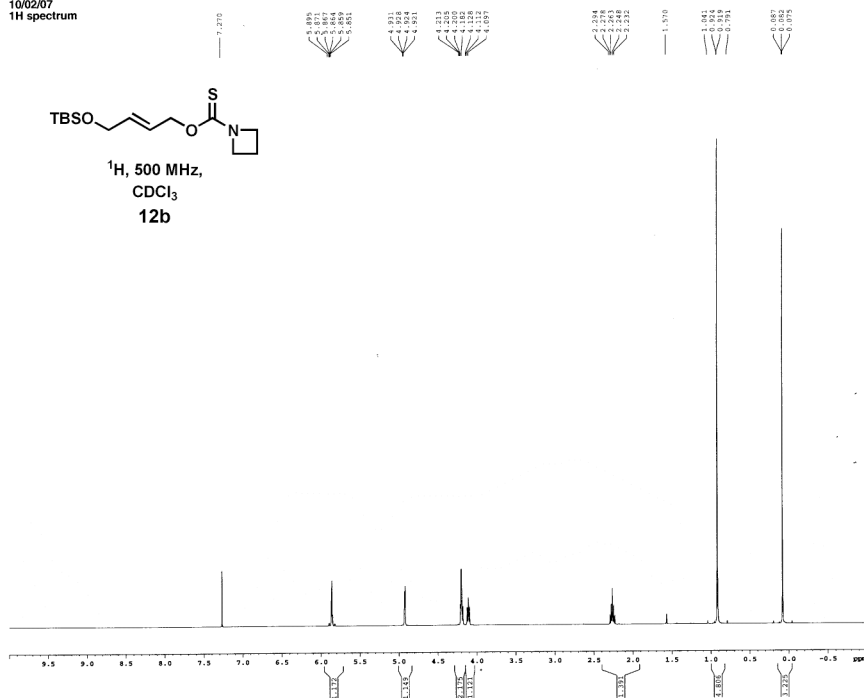

```

Current Data Parameters
USER          hofc11
NAME         HFS-III-80-1
EXPNO       1
PROCNO      1

F2 - Acquisition Parameters
Date_       20070215
Time       13:05
INSTRUM    cryo500
PROBHD     5 mm CPTCI 1H-
PULPROG    zgpg30
TD         65536
SOLVENT    CDCl3
NS         2
DS         4
SWH        2032.800 MHz
FIDRES     0.088043 Hz
AQ         0.039574 sec
RG         40.3
CW         62.400 uM
DE         6.00 uM
TE         298.2 K
D1         0.1000000 sec
d11        0.0000000 sec
MCHRGST   0.0000000 sec
MCHRGX    0.0150000 sec

***** CHANNEL f1 *****
NUC1       1H
P1         8.00 uM
PL1        1.40 dB
SFO1       500.225015 MHz

F2 - Processing parameters
SI         65536
SF         500.2200274 MHz
WDW        EM
SSB        0
LB         0.30 Hz
GB         0
PC         4.00
    
```

HFS-III-80-1  
10/02/07  
13C spectrum with 1H decoupling

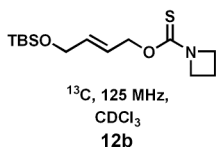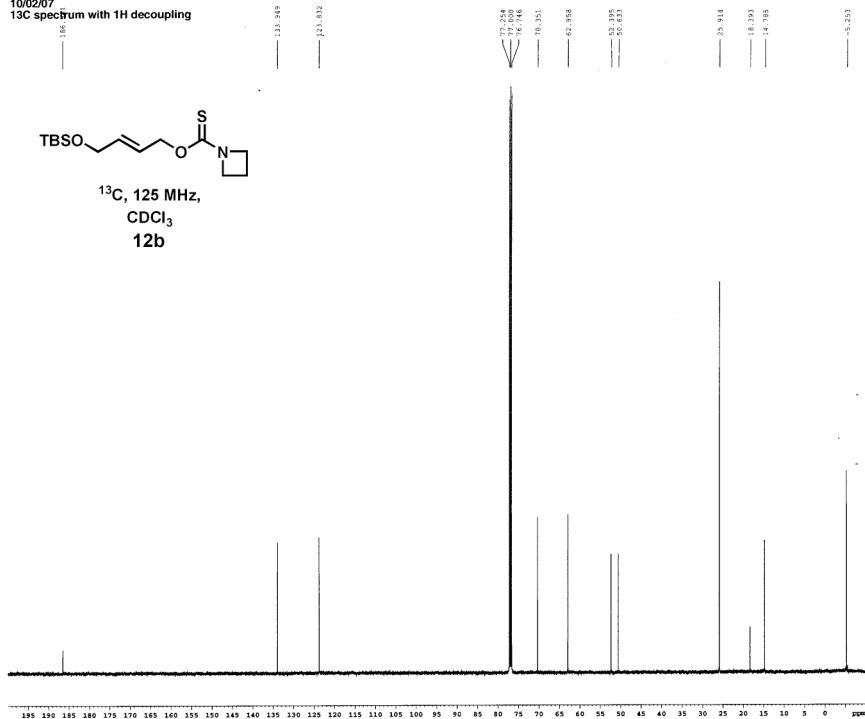

```

Current Data Parameters
USER          hofc11
NAME         HFS-III-80-1
EXPNO       1
PROCNO      1

F2 - Acquisition Parameters
Date_       20070215
Time       13:24
INSTRUM    cryo500
PROBHD     5 mm CPTCI 1H-
PULPROG    zgpg30
TD         65536
SOLVENT    CDCl3
NS         2
DS         4
SWH        20303.031 MHz
FIDRES     0.462222 MHz
AQ         1.079470 sec
RG         9191.2
CW         16.500 uM
DE         6.00 uM
TE         298.2 K
D1         0.2500000 sec
d11        0.0300000 sec
MCHRGST   0.0000000 sec
MCHRGX    0.0150000 sec

***** CHANNEL f1 *****
NUC1       13C
P1         15.00 uM
PL1        1.00 dB
SFO1       125.7842548 MHz

***** CHANNEL f2 *****
CPDPRG2   waltz16
NUC2       1H
PCPD2     100.00 uM
P12       1.40 dB
PL12      21.54 dB
SFO2       500.225011 MHz

F2 - Processing parameters
SI         65536
SF         125.7804291 MHz
WDW        EM
SSB        0
LB         1.00 Hz
GB         0
PC         2.00
    
```





HFS-III-104-III  
01/03/07  
1H spectrum

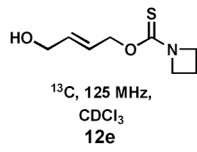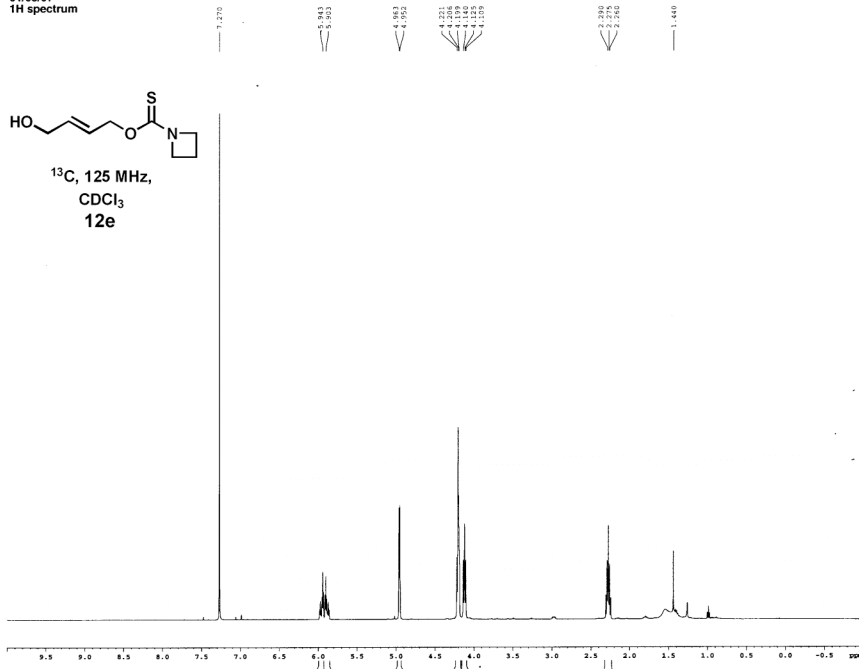

```

Current Data Parameters
USER          ROBERT
NAME         HFS-III-104-III
EXPNO        4
PROCNO       1

F2 - Acquisition Parameters
Date_        20070301
Time         8.33
INSTRUM     cryo500
PROBHD      5 mm CPCL 1H-
PULPROG     zgpg30
TD          65536
SOLVENT     CDCl3
NS          2
DS          2
SWH         8012.80 Hz
FIDRES     0.098043 Hz
AQ         3.0289774 sec
RG         406.4
DM         62.4000 um
DE         6.00 um
TE         298.0 K
D1         0.10000000 sec
d11        0.10000000 sec
H2RESST    0.01500000 sec
MCHNRK     0.01500000 sec

***** CHANNEL f1 *****
NUC1        13C
P1          15.00 um
PL1         -1.00 dB
SFO1       125.7642548 MHz

F2 - Processing parameters
SI         65536
SF         500.225011 MHz
WDW        EM
SSB        0
LB         0.30 Hz
GB         0
PC         4.00
    
```

13C spectrum with 1H decoupling

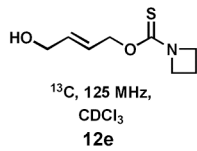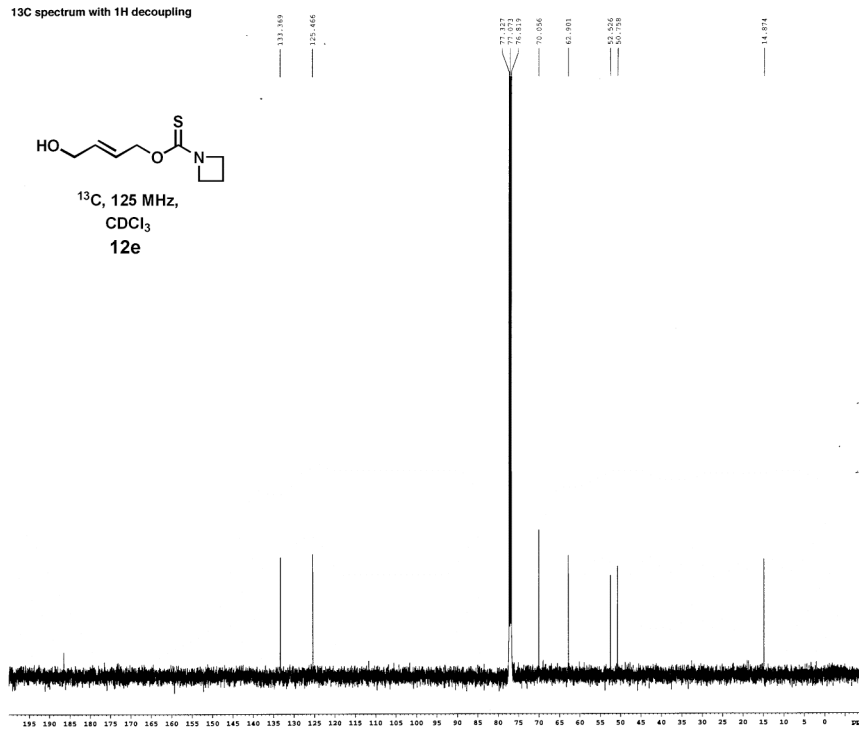

```

Current Data Parameters
USER          ROBERT
NAME         HFS-III-104-III
EXPNO        4
PROCNO       1

F2 - Acquisition Parameters
Date_        20070301
Time         8.33
INSTRUM     cryo500
PROBHD      5 mm CPCL 1H-
PULPROG     zgpg30
TD          65536
SOLVENT     CDCl3
NS          2
DS          2
SWH         30303.031 Hz
FIDRES     0.463222 Hz
AQ         1.0794470 sec
RG         81.92
DM         16.5000 um
DE         6.00 um
TE         298.0 K
D1         0.20000000 sec
d11        0.20000000 sec
H2RESST    0.02000000 sec
MCHNRK     0.02000000 sec

***** CHANNEL f1 *****
NUC1        13C
P1          15.00 um
PL1         -1.00 dB
SFO1       125.7642548 MHz

***** CHANNEL f2 *****
CPROG2     waltz16
NUC2        1H
P2          100.00 um
PL2         1.00 dB
SFO2       500.225011 MHz

F2 - Processing parameters
SI         65536
SF         125.7642548 MHz
WDW        EM
SSB        0
LB         1.00 Hz
GB         0
PC         2.00
    
```

**<sup>1</sup>H spectrum**

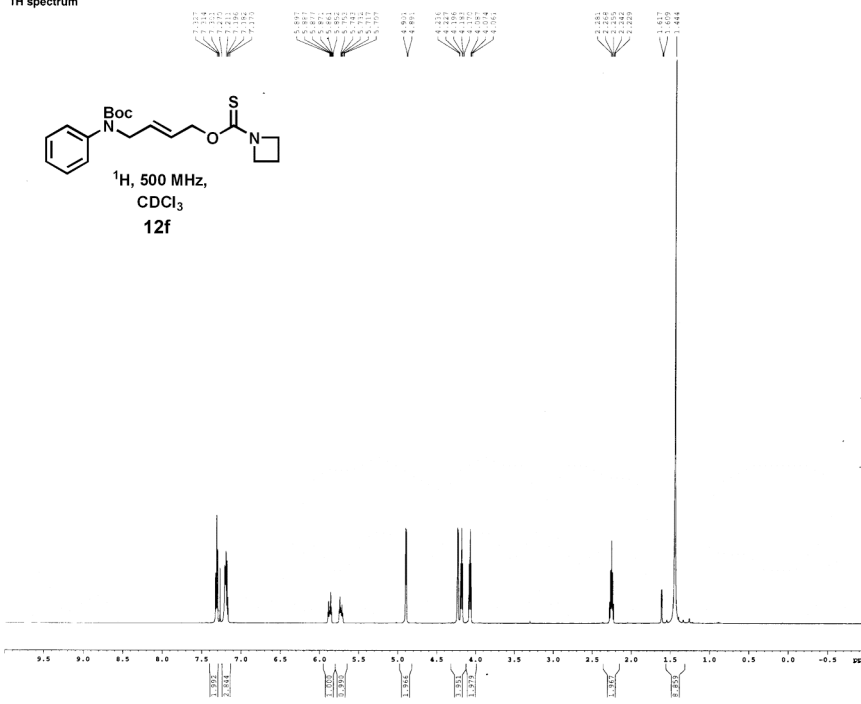

**<sup>13</sup>C spectrum with <sup>1</sup>H decoupling**

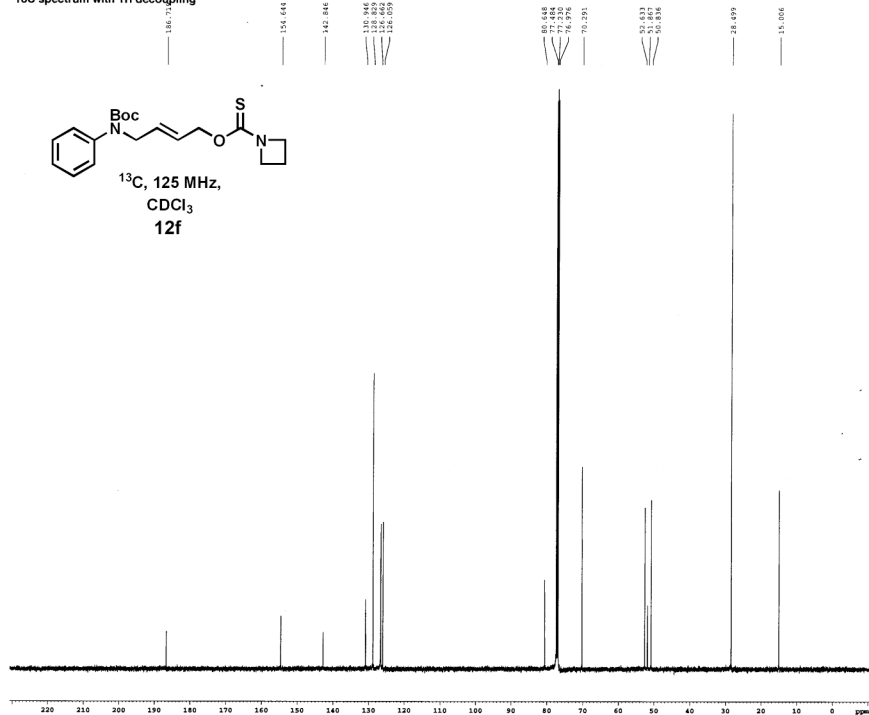





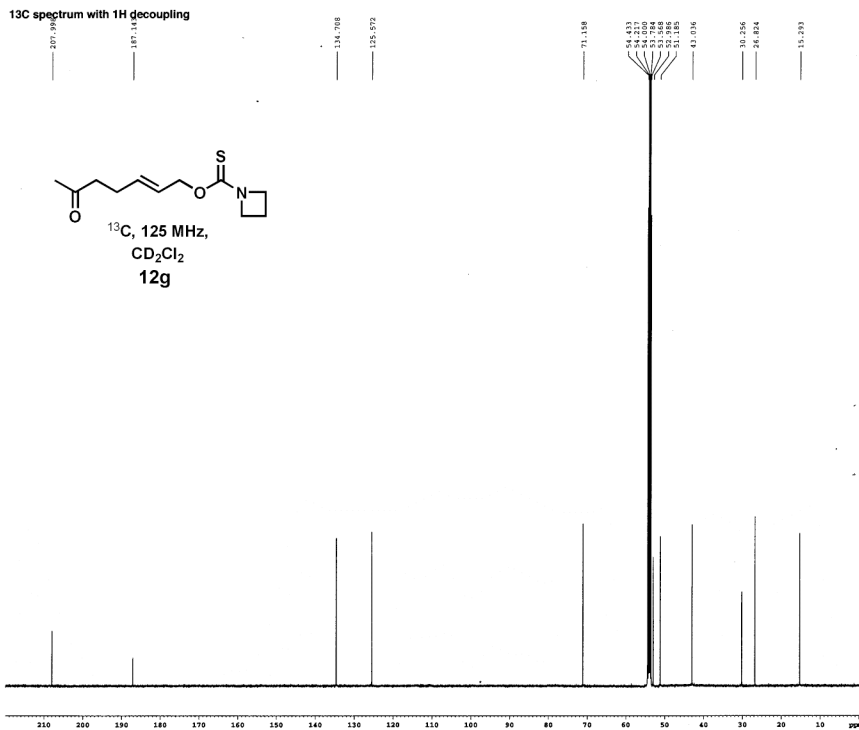

ghmqc

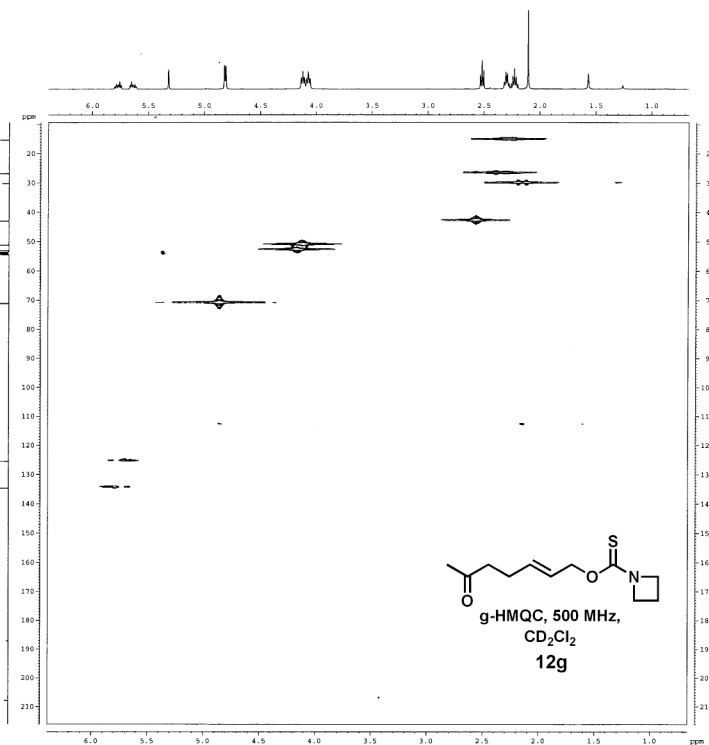



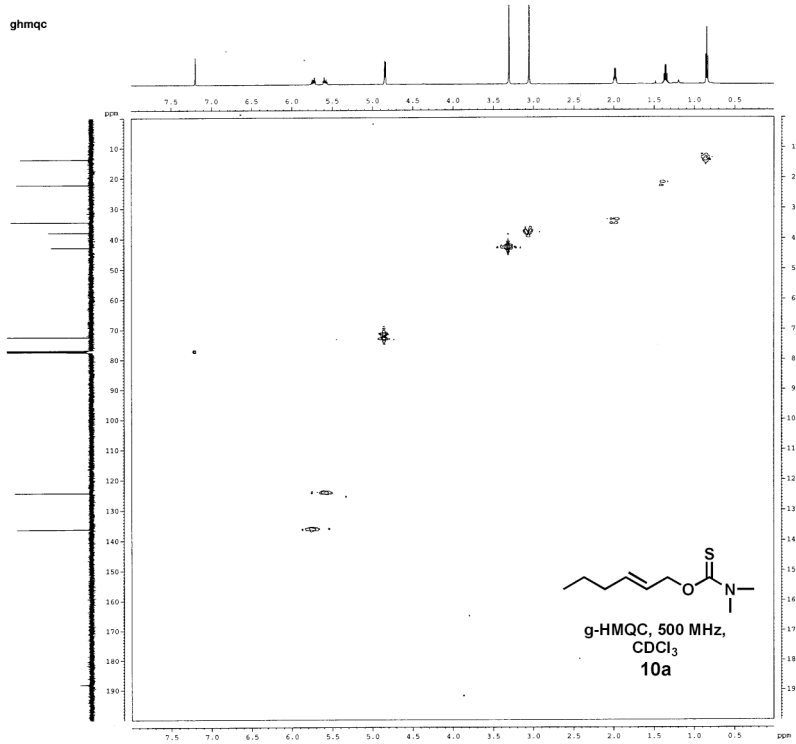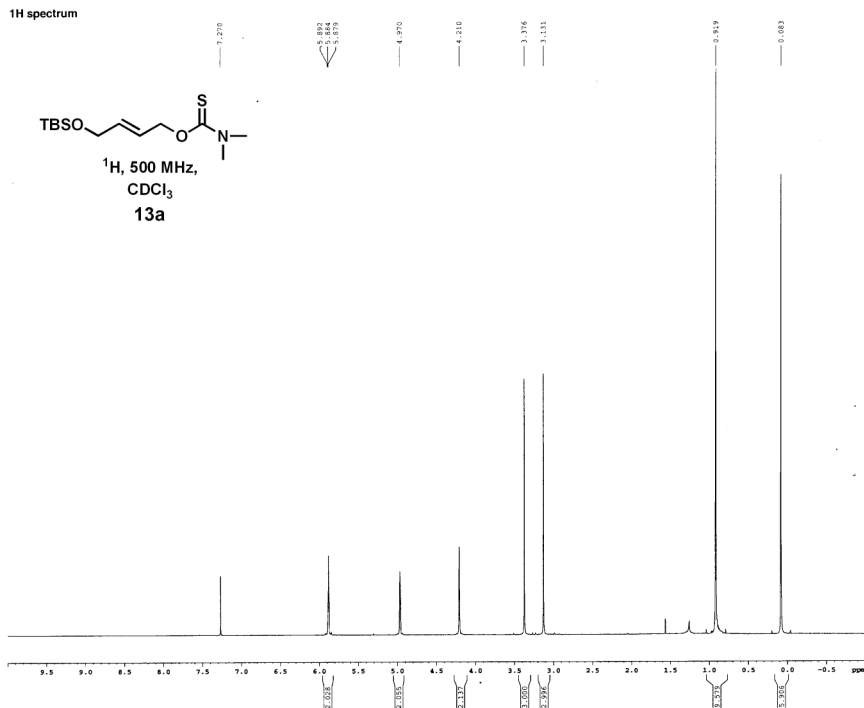

<sup>13</sup>C spectrum with <sup>1</sup>H decoupling

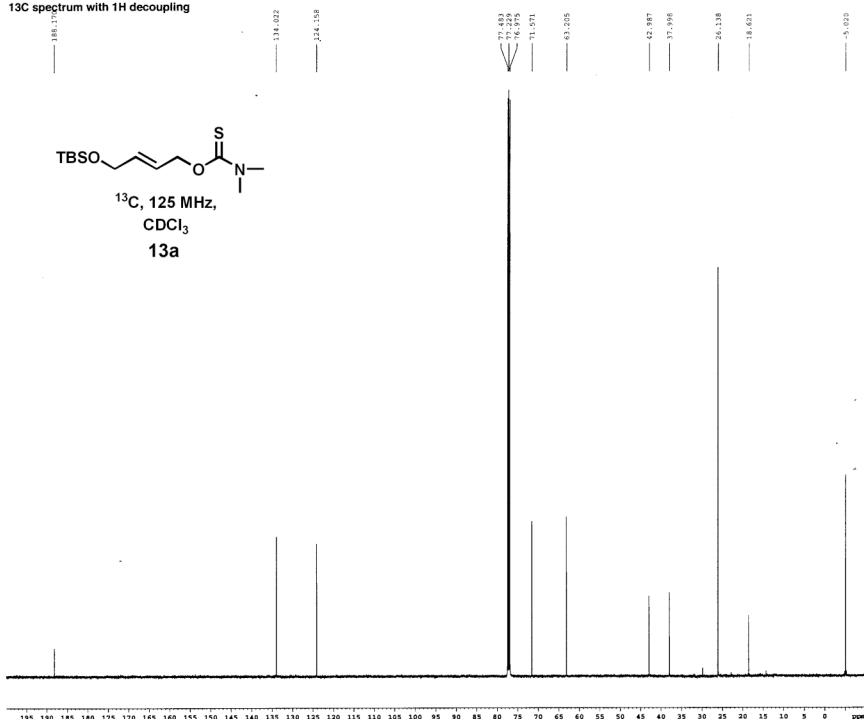

```

Current Data Parameters
USER          dm1148-2
NAME          1
EXPNO         1
PROCNO        1
-----
F2 - Acquisition Parameters
Date_         20071017
Time          13.37
INSTRUM       cryo500
PROBHD        5 mm CPTX1
PULPROG       zgpg30
TD             65536
SOLVENT       CDCl3
NS             542
DS             4
SWH            30363.031 Hz
FIDRES         0.461222 Hz
AQ             1.0794670 sec
RG             13054
DM             16.500 us
DE             6.00 us
TE             298.0 K
D1             0.25000000 sec
d11            0.03000000 sec
d12            0.00000000 sec
MCWRR         0.01500000 sec
-----
***** CHANNEL f1 *****
NUC1           13C
P1             15.00 us
PL1            -1.00 dB
SFO1           125.7614480 MHz
-----
***** CHANNEL f2 *****
waitz16
NUC2           1H
PCPG2          100.00 us
PCPD2          1.00 dB
PL12           23.54 dB
SFO2           500.2212611 MHz
-----
F2 - Processing parameters
SI             65536
SF             125.7613937 MHz
WDW            EM
SSB            0
LB             1.00 Hz
GB             0
PC             2.00
    
```

ghmqc

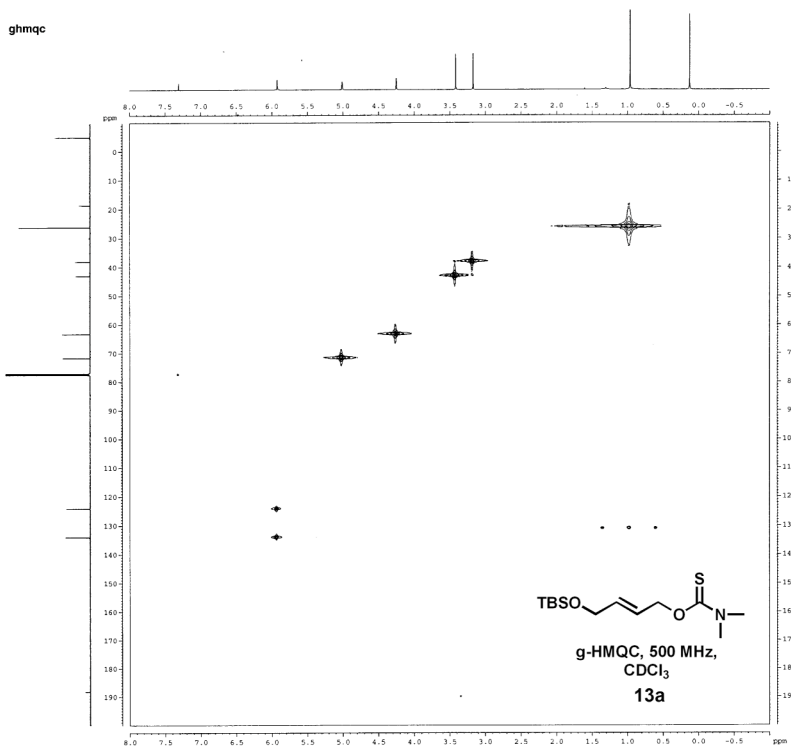

```

Current Data Parameters
USER          dm1148-2
NAME          1
EXPNO         1
PROCNO        1
-----
F2 - Acquisition Parameters
Date_         20071017
Time          14.23
INSTRUM       cryo500
PROBHD        5 mm TBI17
PULPROG       hmqcpgf
TD             65536
SOLVENT       CDCl3
NS             2
DS             4
SWH            4795.336 Hz
FIDRES         0.40021 Hz
AQ             0.092038 sec
RG             1020
DM             184.287 us
DE             60.00 us
TE             298.0 K
D1             145.000000 sec
d11            1.30000000 sec
d12            0.00000000 sec
d13            0.00000000 sec
d14            0.00000000 sec
d15            0.00000000 sec
d16            0.00000000 sec
d17            0.00000000 sec
d18            0.00000000 sec
d19            0.00000000 sec
d20            0.00000000 sec
-----
***** CHANNEL f1 *****
NUC1           1H
P1             15.00 us
PL1            -1.00 dB
SFO1           500.1327068 MHz
-----
***** CHANNEL f2 *****
waitz16
NUC2           13C
P2             15.00 us
PL2            -1.00 dB
SFO2           125.7614480 MHz
-----
***** GRADIENT CHANNEL *****
GPMAX1        50.00 A
GPMAX2        50.00 A
GPMAX3        50.00 A
GPMAX4        50.00 A
GPMAX5        50.00 A
GPMAX6        50.00 A
GPMAX7        50.00 A
GPMAX8        50.00 A
GPMAX9        50.00 A
GPMAX10       50.00 A
-----
F2 - Acquisition parameters
SI             65536
SF             500.1327068 MHz
WDW            EM
SSB            0
LB             1.00 Hz
GB             0
PC             1.00
-----
F2 - Processing parameters
SI             65536
SF             500.1327068 MHz
WDW            EM
SSB            0
LB             1.00 Hz
GB             0
PC             1.00
    
```
