# Supplementary material
Source: PubMed Central journal article supplement (PMC3064473)
Supplement: NIHMS253784-supplement-SI_part_D.pdf [file NIHMS253784-supplement-SI_part_D.pdf]

# Catalytic Asymmetric Synthesis of Allylic Thiol Derivatives

Larry E. Overman,\* Scott W. Roberts, and Helen F. Sneddon

*Department of Chemistry, 1102 Natural Sciences II, University of California,  
Irvine, California 92697-2025, USA*

## Supporting Information – Table of Contents

|                                                                      |            |
|----------------------------------------------------------------------|------------|
| <b>Materials and Methods</b> .....                                   | <b>S1</b>  |
| <b>Experimental Procedures</b> .....                                 | <b>S2</b>  |
| <b>NMR Spectra</b> .....                                             | <b>S16</b> |
| <b>SFC and GC Traces used to Determine Enantiomeric Purity</b> ..... | <b>S48</b> |

## SFC and GC Traces used to Determine Enantiomeric Purity.

SR-1-21-2

Date: 5/29/2007  
 Time: 4:25:24 PM  
 Method Name: SR-2-OB  
 Run Name: SR-21-2-1  
 RunInfo: OB column, 10% IPA, 230 nm, 1.5ml/min

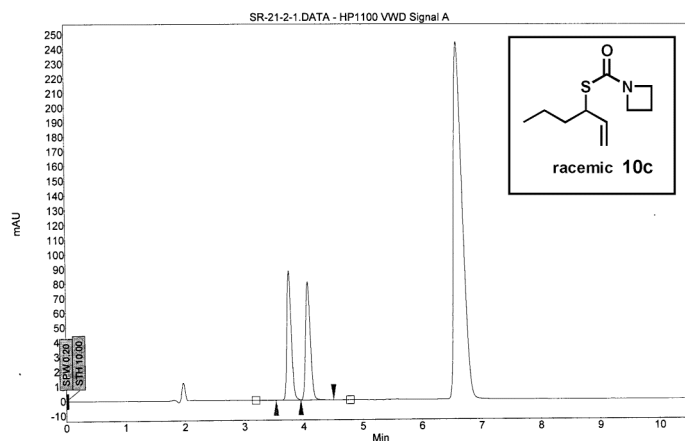

| Index | Name    | Start [Min] | Time [Min] | End [Min] | RT Offset [Min] | Quantity [% Area] | Height [μV] | Area [μV Min] | Area [%] |
|-------|---------|-------------|------------|-----------|-----------------|-------------------|-------------|---------------|----------|
| 1     | UNKNOWN | 3.53        | 3.76       | 3.95      | 0.00            | 50.12             | 88.5        | 7.6           | 50.121   |
| 2     | UNKNOWN | 3.95        | 4.08       | 4.50      | 0.00            | 49.88             | 80.9        | 7.5           | 49.879   |
| Total |         |             |            |           |                 | 100.00            | 169.4       | 15.1          | 100.000  |

Date: 8/14/2007  
 Time: 11:19:41 AM  
 Method Name: SR-2-OB  
 Run Name: SR-1-91-34  
 RunInfo: OB column, 10% IPA, 230 nm, 1.5ml/min

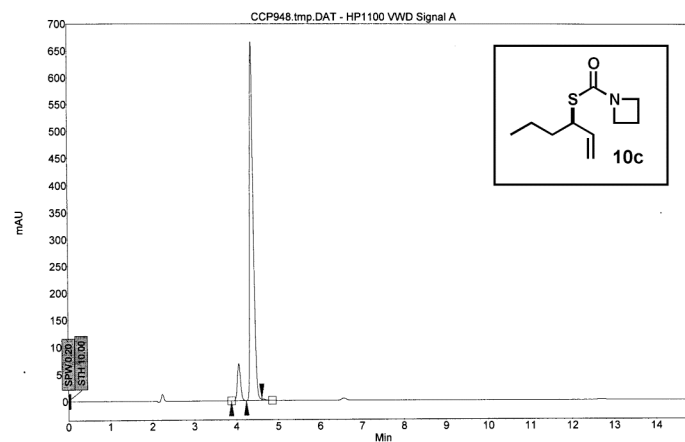

| Index | Name    | Start [Min] | Time [Min] | End [Min] | Height [μV] | Area [μV Min] | Area [%] |         |
|-------|---------|-------------|------------|-----------|-------------|---------------|----------|---------|
| 1     | UNKNOWN | 3.88        | 4.05       | 4.24      | 69.0        | 6.1           | 8.484    |         |
| 2     | UNKNOWN | 4.24        | 4.38       | 4.60      | 666.4       | 66.0          | 91.516   |         |
| Total |         |             |            |           |             | 735.4         | 72.1     | 100.000 |

Date:6/4/2007  
 Time:6:30:13 PM  
 Method Name:SR-3-OB  
 Run Name:SR-1-28-30  
 RunInfo:OB column,10% IPA, 230 nm, 1.0ml/min

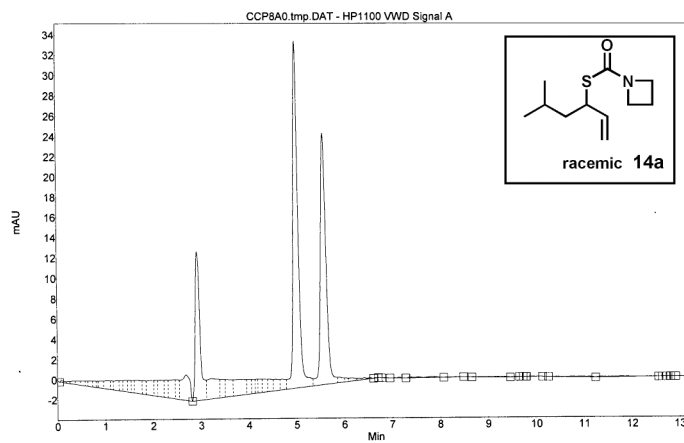

| Index | Name    | Start [Min] | Time [Min] | End [Min] | Height [μV] | Area [μV.Min] | Area [%] |
|-------|---------|-------------|------------|-----------|-------------|---------------|----------|
| 1     | UNKNOWN | 0.04        | 0.08       | 0.18      | 0.2         | 0.0           | 0.138    |
| 2     | UNKNOWN | 0.18        | 0.26       | 0.26      | 0.2         | 0.0           | 0.098    |
| 3     | UNKNOWN | 0.26        | 0.37       | 0.37      | 0.3         | 0.0           | 0.216    |

Date:6/9/2007  
 Time:12:09:50 PM  
 Method Name:SR-3-OB  
 Run Name:SR-1-31-40  
 RunInfo:OB column,10% IPA, 230 nm, 1.0ml/min

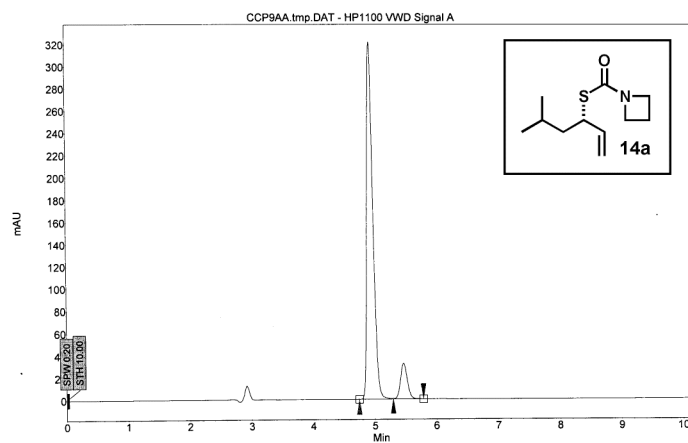

| Index | Name    | Start [Min] | Time [Min] | End [Min] | Height [μV] | Area [μV.Min] | Area [%] |
|-------|---------|-------------|------------|-----------|-------------|---------------|----------|
| 1     | UNKNOWN | 4.75        | 4.94       | 5.30      | 321.9       | 36.9          | 89.960   |
| 2     | UNKNOWN | 5.30        | 5.47       | 5.79      | 32.2        | 4.1           | 10.040   |
| Total |         |             |            |           | 354.1       | 41.0          | 100.000  |

Date: 6/3/2007  
 Time: 3:16:36 PM  
 Method Name: SR-3-OB  
 Run Name: SR-1-26-30  
 RunInfo: OB column, 10% IPA, 230 nm, 1.5ml/min

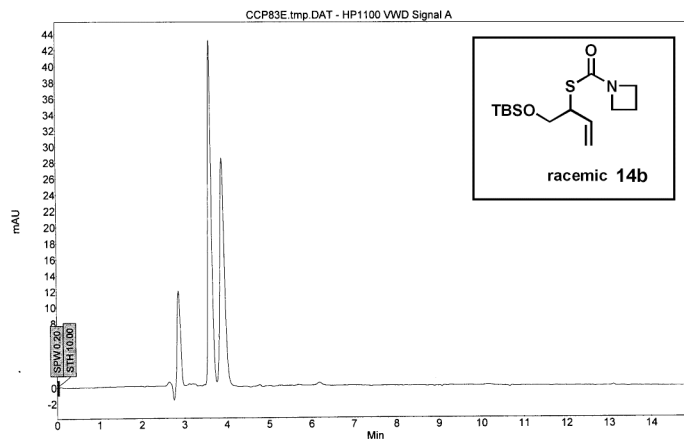

| Index | Name | Start Time [Min] | Time [Min] | End [Min] | Height [μV] | Area [μV.Min] | Area [%] |
|-------|------|------------------|------------|-----------|-------------|---------------|----------|
| Total |      |                  |            |           | 0.0         | 0.0           | 0.000    |

Date: 6/3/2007  
 Time: 3:04:06 PM  
 Method Name: SR-3-OB  
 Run Name: SR-1-14-20  
 RunInfo: OB column, 10% IPA, 230 nm, 1.5ml/min

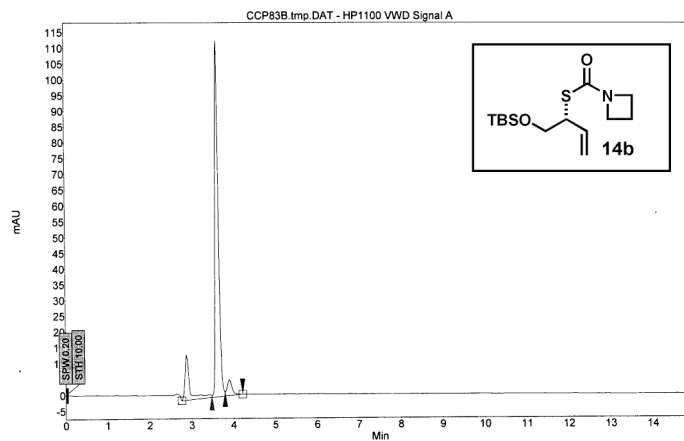

| Index | Name    | Start Time [Min] | Time [Min] | End [Min] | Height [μV] | Area [μV.Min] | Area [%] |
|-------|---------|------------------|------------|-----------|-------------|---------------|----------|
| 1     | UNKNOWN | 3.48             | 3.63       | 3.79      | 113.0       | 10.7          | 94.053   |
| 2     | UNKNOWN | 3.79             | 3.90       | 4.21      | 5.0         | 0.7           | 5.947    |
| Total |         |                  |            |           | 118.0       | 11.3          | 100.000  |

Date: 7/24/2007  
 Time: 11:20:36 AM  
 Method Name: SR-2-OB  
 Run Name: SR-1-67-34  
 Runinfo: OB column, 10% IPA, 230 nm, 1.5ml/min

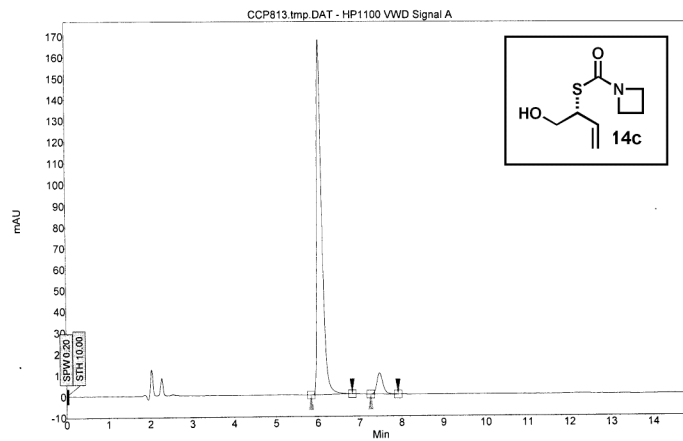

| Index | Name    | Start [Min] | Time [Min] | End [Min] | Height [μV] | Area [μV Min] | Area [%] |
|-------|---------|-------------|------------|-----------|-------------|---------------|----------|
| 1     | UNKNOWN | 5.84        | 6.07       | 6.82      | 168.2       | 23.8          | 93.450   |
| 2     | UNKNOWN | 7.26        | 7.48       | 7.92      | 10.1        | 1.7           | 6.550    |
| Total |         |             |            |           | 178.3       | 25.5          | 100.000  |

Date: 8/11/2007  
 Time: 12:35:43 PM  
 Method Name: SR-2-OB  
 Run Name: SR-1-90-44  
 Runinfo: OB column, 10% IPA, 230 nm, 1.5ml/min

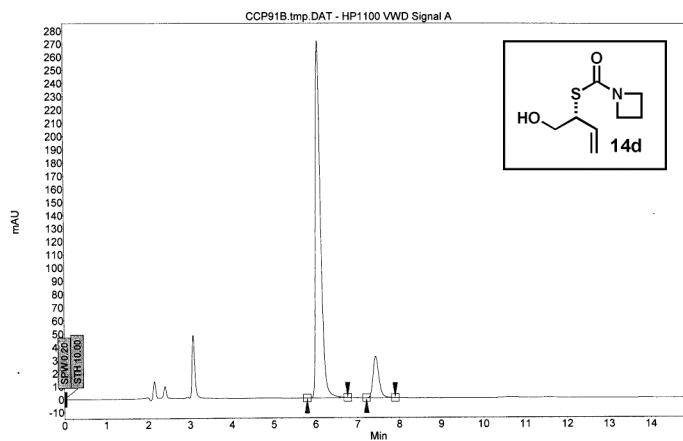

| Index | Name    | Start [Min] | Time [Min] | End [Min] | Height [μV] | Area [μV Min] | Area [%] |
|-------|---------|-------------|------------|-----------|-------------|---------------|----------|
| 1     | UNKNOWN | 5.80        | 6.08       | 6.76      | 272.0       | 37.9          | 88.085   |
| 2     | UNKNOWN | 7.22        | 7.44       | 7.90      | 31.8        | 5.1           | 11.915   |
| Total |         |             |            |           | 303.8       | 43.1          | 100.000  |

Date:6/27/2007  
 Time:2:48:47 PM  
 Method Name:SR-2-OB  
 Run Name:SR-1-48-124  
 RunInfo:OB column,10% IPA, 230 nm, 1.5ml/min

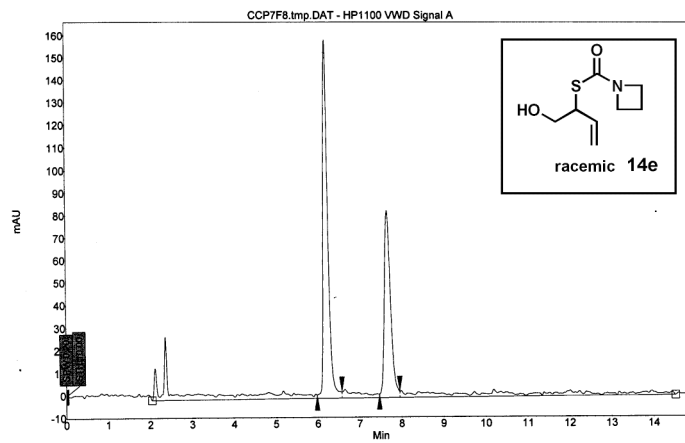

| Index | Name    | Start [Min] | Time [Min] | End [Min] | Height [μV] | Area [μV.Min] | Area [%] |
|-------|---------|-------------|------------|-----------|-------------|---------------|----------|
| 1     | UNKNOWN | 5.98        | 6.21       | 6.57      | 159.6       | 21.0          | 59.240   |
| 2     | UNKNOWN | 7.47        | 7.67       | 7.95      | 83.3        | 14.4          | 40.760   |
| Total |         |             |            |           | 242.9       | 35.4          | 100.000  |

Date:6/28/2007  
 Time:4:36:07 PM  
 Method Name:SR-2-OB  
 Run Name:SR-1-50-34  
 RunInfo:OB column,10% IPA, 230 nm, 1.5ml/min

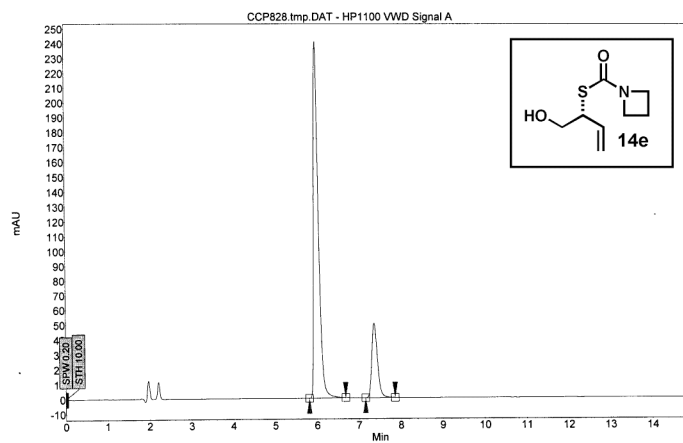

| Index | Name    | Start [Min] | Time [Min] | End [Min] | Height [μV] | Area [μV.Min] | Area [%] |
|-------|---------|-------------|------------|-----------|-------------|---------------|----------|
| 1     | UNKNOWN | 5.81        | 6.00       | 6.68      | 241.1       | 32.1          | 80.386   |
| 2     | UNKNOWN | 7.15        | 7.37       | 7.86      | 50.0        | 7.8           | 19.614   |
| Total |         |             |            |           | 291.1       | 39.9          | 100.000  |

Date:9/25/2007  
 Time:9:33:52 AM  
 Method Name:SR-2-AD  
 Run Name:SR-1-131-AD-10  
 Runinfo:AD column,10% IPA, 230 nm, 1.5ml/min

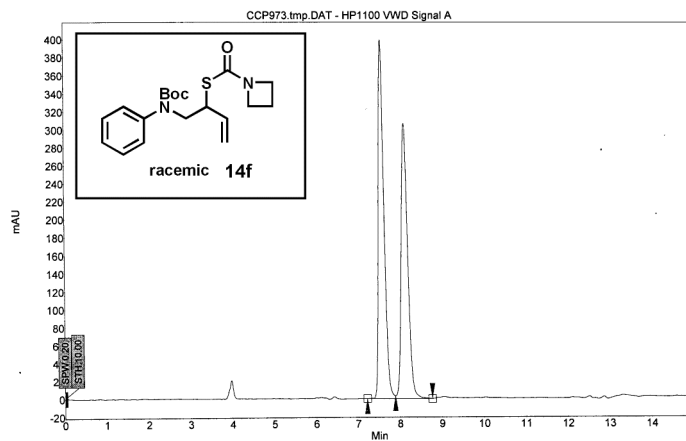

| Index | Name    | Start [Min] | Time [Min] | End [Min] | RT Offset [Min] | Quantity [% Area] | Height [μV] | Area [μV.Min] | Area [%] |
|-------|---------|-------------|------------|-----------|-----------------|-------------------|-------------|---------------|----------|
| 1     | UNKNOWN | 7.22        | 7.58       | 7.89      | 0.00            | 52.68             | 399.7       | 61.9          | 52.677   |
| 2     | UNKNOWN | 7.89        | 8.13       | 8.77      | 0.00            | 47.32             | 306.9       | 55.6          | 47.323   |
| Total |         |             |            |           |                 | 100.00            | 706.7       | 117.6         | 100.000  |

Date:9/25/2007  
 Time:9:44:38 AM  
 Method Name:SR-2-AD  
 Run Name:SR-1-132-AD-60  
 Runinfo:AD column,10% IPA, 230 nm, 1.5ml/min

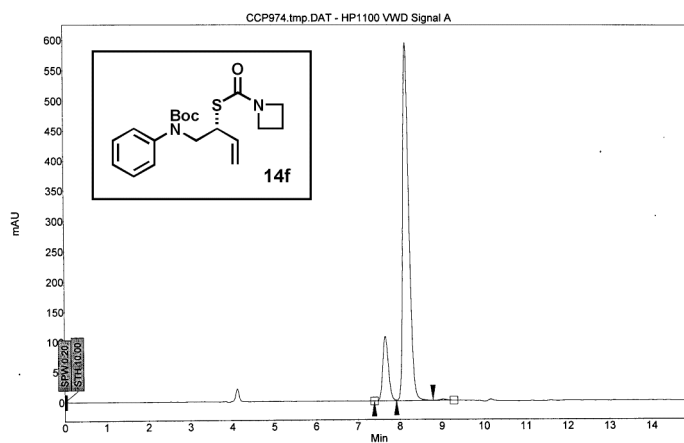

| Index | Name    | Start [Min] | Time [Min] | End [Min] | RT Offset [Min] | Quantity [% Area] | Height [μV] | Area [μV.Min] | Area [%] |
|-------|---------|-------------|------------|-----------|-----------------|-------------------|-------------|---------------|----------|
| 1     | UNKNOWN | 7.39        | 7.66       | 7.92      | 0.00            | 14.30             | 107.1       | 16.6          | 14.295   |
| 2     | UNKNOWN | 7.92        | 8.18       | 8.79      | 0.00            | 85.70             | 595.0       | 99.8          | 85.705   |
| Total |         |             |            |           |                 | 100.00            | 702.1       | 116.5         | 100.000  |

Date:9/20/2007  
 Time:11:29:45 AM  
 Method Name:SR-2-OB  
 Run Name:SR-1-127-45  
 Runinfo:OB column,10% IPA, 230 nm, 1.5ml/min

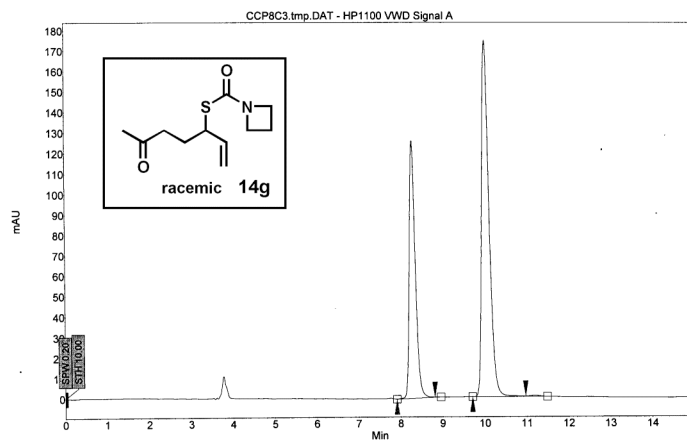

| Index | Name    | Start [Min] | Time [Min] | End [Min] | Height [uV] | Area [uV.Min] | Area [%] |
|-------|---------|-------------|------------|-----------|-------------|---------------|----------|
| 1     | UNKNOWN | 7.91        | 8.30       | 8.81      | 126.5       | 21.1          | 37.116   |
| 2     | UNKNOWN | 9.71        | 10.04      | 10.97     | 175.0       | 35.8          | 62.884   |
| Total |         |             |            |           | 301.5       | 56.9          | 100.000  |

Date:9/20/2007  
 Time:10:52:04 AM  
 Method Name:SR-2-OB  
 Run Name:SR-1-126-45  
 Runinfo:OB column,10% IPA, 230 nm, 1.5ml/min

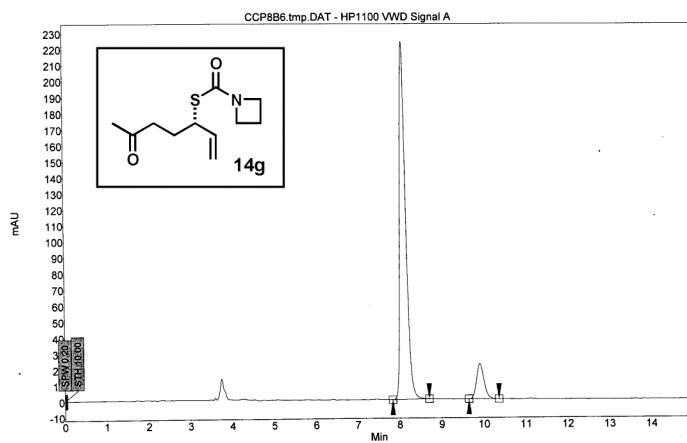

| Index | Name    | Start [Min] | Time [Min] | End [Min] | Height [uV] | Area [uV.Min] | Area [%] |
|-------|---------|-------------|------------|-----------|-------------|---------------|----------|
| 1     | UNKNOWN | 7.83        | 8.11       | 8.70      | 224.6       | 37.6          | 89.196   |
| 2     | UNKNOWN | 9.65        | 9.91       | 10.36     | 22.2        | 4.6           | 10.804   |
| Total |         |             |            |           | 246.7       | 42.2          | 100.000  |



```

Injection Date : 11/14/2007 2:27:56 PM      Location : Vial 1
Sample Name    : swr-1-136                    Inj : 1
Acq. Operator  : SCOTT                        Inj Volume : Manually
Acq. Instrument : Instrument 2
Acq. Method    : C:\HPCHEM\2\METHODS\SCOTT\SCOTT.M
Last changed   : 11/14/2007 2:23:08 PM by angle
                (modified after loading)
Analysis Method : C:\HPCHEM\2\METHODS\SCOTT\SCOTT.M
Last changed   : 11/14/2007 2:58:45 PM by SCOTT
                (modified after loading)
Checkout first runs on new instrument

```

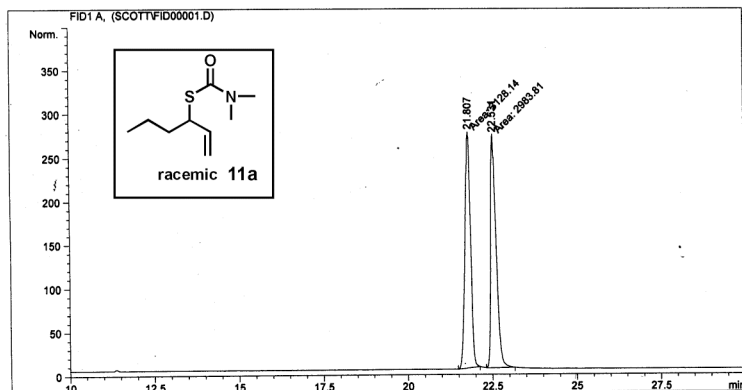

| Peak # | RetTime [min] | Type | Width [min] | Area [pA*s] | Area %   | Name           |
|--------|---------------|------|-------------|-------------|----------|----------------|
| 6      | 2.228         |      | 0.0000      | 0.00000     | 0.00000  | acenaphthalene |
| 7      | 2.266         |      | 0.0000      | 0.00000     | 0.00000  | dodecanol      |
| 8      | 2.528         |      | 0.0000      | 0.00000     | 0.00000  | C15            |
| 9      | 21.807        | MM   | 0.1928      | 3128.13940  | 51.18075 | ?              |
| 10     | 22.531        | MM   | 0.1861      | 2983.80566  | 48.81925 | ?              |

Totals : 6111.94507

Results obtained with standard integrator!  
1 Warnings or Errors :

Warning : Calibrated compound(s) not found

120 C/100 min Flow: 1.5 mL/min  
Agilent 112-6632, Cyclosil-B, Capillary 30.0m x 250um x  
0.25um nominal, 250 degree centigrade max  
CH2CH2Ph PhOH rac std

```

Injection Date : 11/14/2007 3:03:18 PM      Location : Vial 1
Sample Name    : swr-1-144                    Inj : 1
Acq. Operator  : SCOTT                        Inj Volume : Manually
Acq. Instrument : Instrument 2
Acq. Method    : C:\HPCHEM\2\METHODS\SCOTT\SCOTT.M
Last changed   : 11/14/2007 2:58:45 PM by SCOTT
                (modified after loading)
Analysis Method : C:\HPCHEM\2\METHODS\SCOTT\SCOTT.M
Last changed   : 11/14/2007 3:38:51 PM by SCOTT
                (modified after loading)
Checkout first runs on new instrument

```

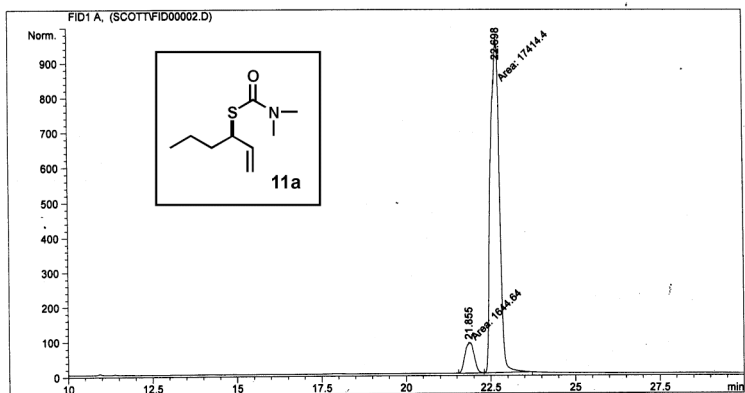

| Peak # | RetTime [min] | Type | Width [min] | Area [pA*s] | Area %   | Name           |
|--------|---------------|------|-------------|-------------|----------|----------------|
| 6      | 2.228         |      | 0.0000      | 0.00000     | 0.00000  | acenaphthalene |
| 7      | 2.266         |      | 0.0000      | 0.00000     | 0.00000  | dodecanol      |
| 8      | 2.528         |      | 0.0000      | 0.00000     | 0.00000  | C15            |
| 9      | 21.855        | MM   | 0.3119      | 1644.63892  | 8.62919  | ?              |
| 10     | 22.698        | MM   | 0.3022      | 1.74144e4   | 91.37081 | ?              |

Totals : 1.90590e4

Results obtained with standard integrator!  
1 Warnings or Errors :

Warning : Calibrated compound(s) not found

Data File C:\HPCHEM\2\DATA\SCOTT\FID00021.D

Sample Name: swr-1-162

110 C/120 min Flow: 1.5 mL/min  
Agilent 112-6632, Cyclosil-B, Capillary 30.0m x 250um x  
0.25um nominal, 250 degree centigrade max  
CH2CH2Ph PhOH rac std

Injection Date : 11/19/2007 10:17:28 AM  
Sample Name : swr-1-162 Location : Vial 1  
Acq. Operator : SCOTT Inj : 1  
Acq. Instrument : Instrument 2 Inj Volume : Manually  
Acq. Method : C:\HPCHEM\2\METHODS\SCOTT\SCOTT.M  
Last changed : 11/19/2007 11:52:46 AM by SCOTT  
(modified after loading)  
Analysis Method : C:\HPCHEM\2\METHODS\SHUTDOWN.M  
Last changed : 11/19/2007 5:33:47 PM by SCOTT  
(modified after loading)  
Checkout first runs on new instrument

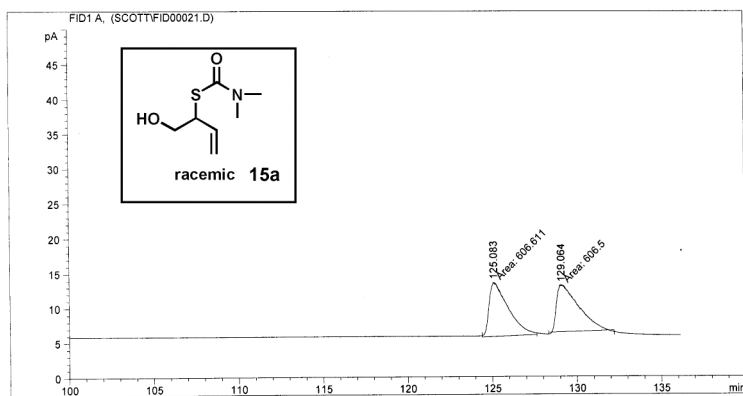

Area Percent Report

Sorted By : Signal  
Multiplier : 1.0000  
Dilution : 1.0000  
Use Multiplier & Dilution Factor with ISTDs

Signal 1: FID1 A,

| Peak # | RetTime [min] | Type | Width [min] | Area [pA*s] | Height [pA] | Area %   |
|--------|---------------|------|-------------|-------------|-------------|----------|
| 1      | 125.083       | MM   | 1.2911      | 606.61066   | 7.83068     | 50.00455 |
| 2      | 129.064       | MM   | 1.4918      | 606.50018   | 6.77580     | 49.99545 |

Totals : 1213.11084 14.60648

Results obtained with standard integrator!

Instrument 2 11/19/2007 5:49:59 PM SCOTT

Page 1 of 2

Data File C:\HPCHEM\2\DATA\SCOTT\FID00023.D

Sample Name: swr-1-164

110 C/160 min Flow: 1.5 mL/min  
 Agilent 112-6632, Cyclosil-B, Capillary 30.0m x 250um x  
 0.25um nominal, 250 degree centigrade max  
 CH2CH2Ph PhOH rac std

=====  
 Injection Date : 11/19/2007 2:57:39 PM  
 Sample Name : swr-1-164 Location : Vial 1  
 Acq. Operator : SCOTT Inj : 1  
 Acq. Instrument : Instrument 2 Inj Volume : Manually  
 Acq. Method : C:\HPCHEM\2\METHODS\SCOTT\SCOTT.M  
 Last changed : 11/19/2007 2:56:27 PM by SCOTT  
 (modified after loading)  
 Analysis Method : C:\HPCHEM\2\METHODS\SHUTDOWN.M  
 Last changed : 11/19/2007 5:33:47 PM by SCOTT  
 (modified after loading)  
 Checkout first runs on new instrument

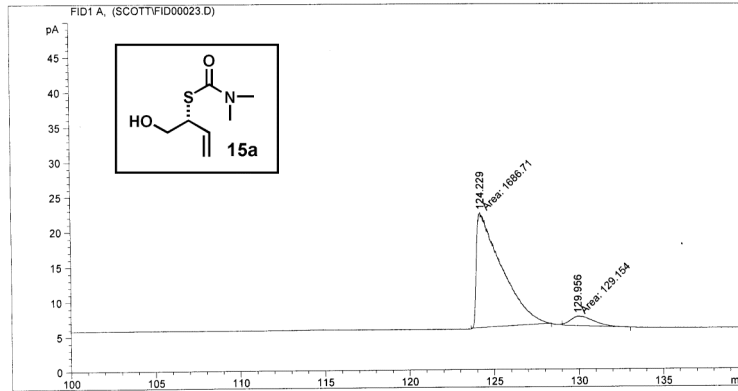

=====  
 Area Percent Report  
 =====

Sorted By : Signal  
 Multiplier : 1.0000  
 Dilution : 1.0000  
 Use Multiplier & Dilution Factor with ISTDs

Signal 1: FID1 A,

| Peak # | RetTime [min] | Type | Width [min] | Area [pA*s] | Height [pA] | Area %   |
|--------|---------------|------|-------------|-------------|-------------|----------|
| 1      | 124.229       | MM   | 1.7073      | 1686.70764  | 16.46583    | 92.88744 |
| 2      | 129.956       | MM   | 1.5509      | 129.15434   | 1.38794     | 7.11256  |

Totals : 1815.86198 17.85376

Results obtained with standard integrator!

Instrument 2 11/19/2007 5:34:11 PM SCOTT

Date:1/16/2008  
 Time:10:59:53 AM  
 Method Name:SR-3-OB  
 Run Name:SR-1-155-251  
 RunInfo:OB column,10% of a 1:1 Hex:IPA, 230 nm, 1.0ml/min

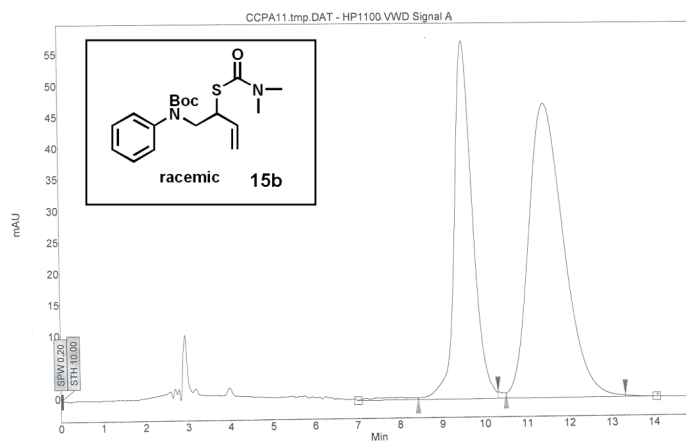

| Index | Name    | Start [Min] | Time [Min] | End [Min] | Height [μV] | Area [μV.Min] | Area [%] |
|-------|---------|-------------|------------|-----------|-------------|---------------|----------|
| 1     | UNKNOWN | 8.43        | 9.55       | 10.31     | 57.5        | 28.4          | 38.588   |
| 2     | UNKNOWN | 10.50       | 11.47      | 13.32     | 47.3        | 45.3          | 61.414   |
| Total |         |             |            |           | 104.8       | 73.7          | 100.000  |

Date:1/16/2008  
 Time:11:32:09 AM  
 Method Name:SR-3-OB  
 Run Name:SR-1-154-211  
 RunInfo:OB column,10% of a 1:1 Hex:IPA, 230 nm, 1.0ml/min

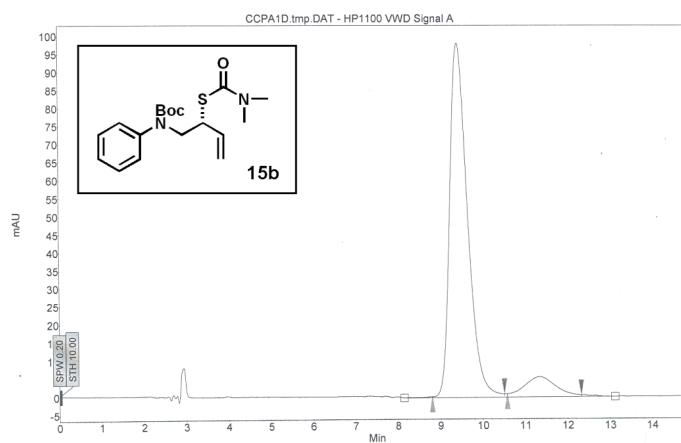

| Index | Name    | Start [Min] | Time [Min] | End [Min] | Height [μV] | Area [μV.Min] | Area [%] |
|-------|---------|-------------|------------|-----------|-------------|---------------|----------|
| 1     | UNKNOWN | 8.30        | 9.45       | 10.51     | 98.6        | 47.8          | 90.609   |
| 2     | UNKNOWN | 10.57       | 11.35      | 12.32     | 5.6         | 5.0           | 9.391    |
| Total |         |             |            |           | 104.2       | 52.7          | 100.000  |

Injection Date : 12/30/06 12:54:50 PM      Seq. Line : 2  
 Sample Name : HSII271a                              Location : Vial 2  
 Acq. Operator : Helen                                Inj : 1  
 Acq. Instrument : Chiral                            Inj Volume : 10 µl  
 Different Inj Volume from Sequence !      Actual Inj Volume : 5 µl  
 Acq. Method : C:\HPCHEM\1\METHODS\HFS.M  
 Last changed : 12/30/06 12:10:14 PM by Helen  
 Analysis Method : C:\HPCHEM\2\METHODS\DEF.LC.M  
 DAD1 A, Sig=250,100 Ref=360,100 (C:\HPCHEM\1\DATA\HELEN\HSII271A.D)

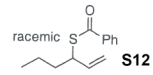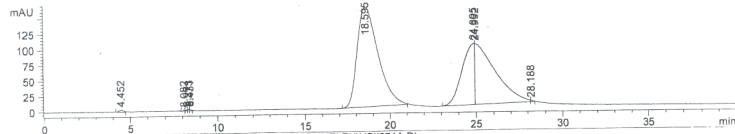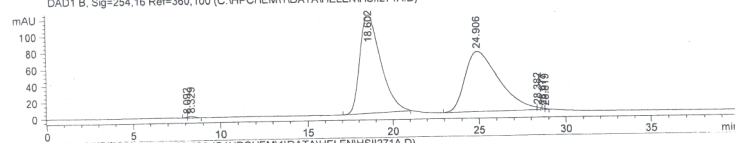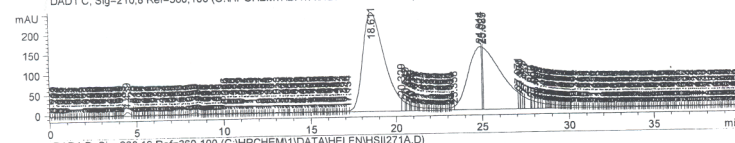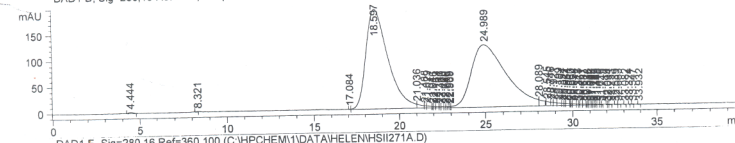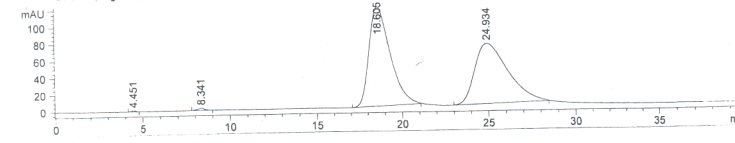

-----  
 Injection Date : 12/30/06 6:25:45 PM      Seq. Line : 10  
 Sample Name : HSI1273                              Location : Vial 10  
 Acq. Operator : Helen                                Inj : 1  
 Acq. Instrument : Chiral                            Inj Volume : 10 µl  
 Different Inj Volume from Sequence !      Actual Inj Volume : 5 µl  
 Acq. Method : C:\HPCHEM\1\METHODS\HFS.M  
 Last changed : 12/30/06 12:10:14 PM by Helen  
 Analysis Method : C:\HPCHEM\2\METHODS\DEF.LC.M  
 -----

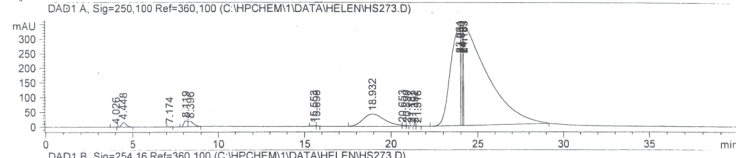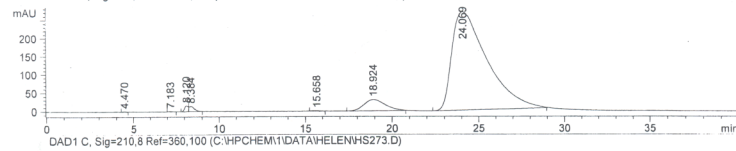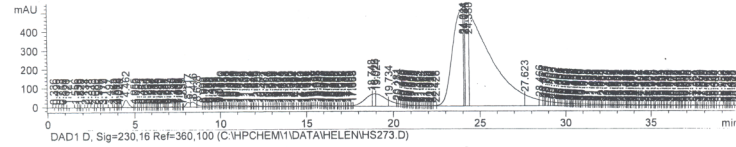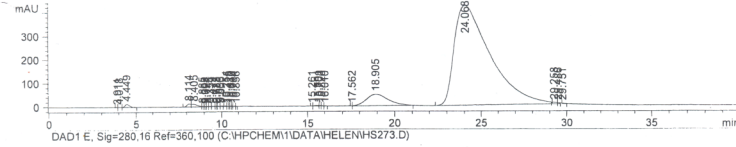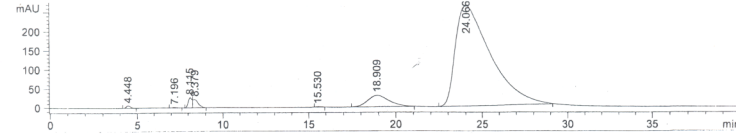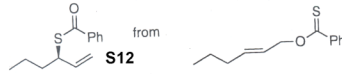

```

=====
Injection Date : 1/15/2007 10:52:59 AM      Seq. Line : 2
Sample Name   : HSI1143                    Location  : Vial 82
Acq. Operator : Helen                      Inj      : 1
                                           Inj Volume: 10 µl
Sequence File : C:\HPCHEM\1\SEQUENCE\HELEN.S
Method        : C:\HPCHEM\1\METHODS\JASONSD.M\HFS.M
Last changed  : 1/15/2007 9:45:05 AM by xia
98 hex od-h
    
```

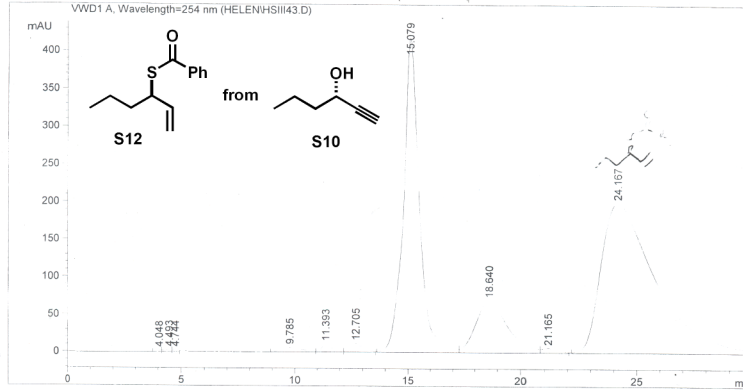

Area Percent Report

```

Sorted By      : Signal
Multiplier     : 1.0000
Dilution       : 1.0000
Use Multiplier & Dilution Factor with ISTDs
    
```

Signal 1: VWD1 A, Wavelength=254 nm

| Peak #   | RetTime [min] | Type | Width [min] | Area mAU*s | Height [mAU] | Area %  |
|----------|---------------|------|-------------|------------|--------------|---------|
| 1        | 4.048         | PV   | 0.1939      | 33.76759   | 2.41183      | 0.0543  |
| 2        | 4.493         | VV   | 0.2924      | 67.45816   | 2.97299      | 0.1084  |
| 3        | 4.744         | VV   | 0.1894      | 35.52735   | 2.60917      | 0.0571  |
| 4        | 9.785         | BV   | 0.8218      | 378.49341  | 6.29923      | 0.6082  |
| 5        | 11.393        | VV   | 0.4832      | 362.81226  | 11.01764     | 0.5830  |
| 6        | 12.705        | VB   | 0.5398      | 436.62988  | 12.15947     | 0.7016  |
| 7        | 15.079        | BV   | 0.7110      | 2.07810e4  | 418.01144    | 33.3933 |
| 8        | 18.640        | VV   | 1.4581      | 6795.22314 | 69.76746     | 10.9194 |
| 9        | 21.165        | VB   | 0.6929      | 305.19711  | 6.38687      | 0.4504  |
| 10       | 24.167        | BBA  | 2.4191      | 3.30349e4  | 200.45934    | 53.0843 |
| Totals : |               |      |             | 6.22310e4  | 732.09543    |         |

0.829-0.171  
= 66%
